# Supplementary material for: Medical Students’ Views on Cannabis Use in Recreational Contexts Are Related to Their Own Consumption Intention
Source: MDPI journal article supplement (doi:10.3390/soc14040052), 2024-04-11

# CannabisTim EN

This project is carried out by "Victor Babes" University of Medicine and Pharmacy in Timisoara in collaboration with the Liaison Psychiatry Department of "Pius Brinzeu" County Emergency Clinical Hospital in Timisoara and has the approval of the Scientific Research Ethics Commission.

Registration is not required for your participation in this study. No identifying data is collected, so we ensure that your responses are free of any coercion.

There are no risks to your participation in this study. However, completing the survey requires your time and **we thank you** for your participation.

All data in this questionnaire is anonymous and strictly confidential. Access to the data is very strict and will only be allowed to members of the research team. These researchers are the only people authorized to examine them. For the scientific analysis, the data will be processed without information that allows your identification (free text fields will be filtered before the actual data analysis).

Data collection and processing is conducted following the European General Data Protection Regulation: GDPR (<https://gdpr.eu/>).

If you have any questions or concerns, now or later, about your participation in this study, the conduct of this study, your risks, and your rights, please contact us:

Bianca Matei: *<e-mail>*

Lucreția Marin-Băncilă: *<e-mail>*

Minas Gabriel Muscă: *<e-mail>*

Dr. Anca-Livia Panfil: *<e-mail>*

Dr. Simona Tămășan: *<e-mail>*

Estimated time to completion: 20-25 minutes.

If you use the same Google account, you can pause and resume filling out the form at a later date.

Continuing constitutes **your consent** to participate in this study.

You can withdraw at any stage: the filled out data is saved in the database only when you press the "SUBMIT" button.

---

*\* Indicates required question*

## CUIQ: Cannabis Use Intention Questionnaire

The CUIQ questionnaire was developed within the CAPPYC European project (<https://cappyc.eu/en/>).

It assesses attitude towards cannabis use and intention to use. The CUIQ questionnaire is available for free (<https://cappyc.eu/en/english-docs>).

There are no right or wrong answers, only **your opinion** matters.

1. You think that consuming marijuana or hash... \*  
... helps you to relax?

*Mark only one oval.*

Not at all

1

☐

2

☐

3

☐

4

☐

5

☐

Very much

2. You think that consuming marijuana or hash... \*  
... makes you feel good?

*Mark only one oval.*

Not at all

1 ☐

2 ☐

3 ☐

4 ☐

5 ☐

Very much

3. You think that consuming marijuana or hash... \*  
... allows you to have more creativity and imagination?

*Mark only one oval.*

Not at all

1 ☐

2 ☐

3 ☐

4 ☐

5 ☐

Very much

4. You think that consuming marijuana or hash... \*  
... makes you have fun (get high)?

*Mark only one oval.*

Not at all

1 ☐

2 ☐

3 ☐

4 ☐

5 ☐

Very much

5. Please, tell us how important relaxing is to you \*

Mark only one oval.

Not at all important

1 ☐

2 ☐

3 ☐

4 ☐

5 ☐

Very important

6. Please, tell us how important feeling good is to you \*

Mark only one oval.

Not at all important

1 ☐

2 ☐

3 ☐

4 ☐

5 ☐

Very important

7. Please, tell us how important having more creativity and imagination is to you \*

Mark only one oval.

Not at all important

1 ☐

2 ☐

3 ☐

4 ☐

5 ☐

Very important



8. Please, tell us how important having fun consuming marijuana or hash (getting high) is to you \*

Mark only one oval.

Not at all important

1 ☐

2 ☐

3 ☐

4 ☐

5 ☐

Very important

9. Please, now think about the people closest to you. \*

To what extent would your close friends be accepting if you consume marijuana or hash?

*Mark only one oval.*

Very unaccepting

1

☐

2

☐

3

☐

4

☐

5

☐

Very accepting

10. Please, now think about the people closest to you. \*

To what extent would your colleagues be accepting if you consume marijuana or hash?

Mark only one oval.

Very unaccepting

1

☐

2

☐

3

☐

4

☐

5

☐

Very accepting

11. Please, now think about the people closest to you. \*

To what extent would your girlfriend/ boyfriend or the person you like be accepting if you consume marijuana or hash?

Mark only one oval.

Very unaccepting

1

☐

2

☐

3

☐

4

☐

5

☐

Very accepting

12. How do you consider the opinion of your close friends in reference to marijuana or \* hash?

Mark only one oval.

Not at all important

1 ☐

2 ☐

3 ☐

4 ☐

5 ☐

Very important

13. How do you consider the opinion of your colleagues in reference to marijuana or hash? \*

Mark only one oval.

Not at all important

1 ☐

2 ☐

3 ☐

4 ☐

5 ☐

Very important

14. How do you consider the opinion of your girlfriend/ boyfriend or the person you like in reference to marijuana or hash? \*

Mark only one oval.

Not at all important

1

☐

2

☐

3

☐

4

☐

5

☐

Very important

15. To what extent do you think you would be comfortable without smoking joints? \*

Mark only one oval.

Not at all capable

1 ☐

2 ☐

3 ☐

4 ☐

5 ☐

Totally capable



16. To what extent do you think you would be with friends without smoking joints? \*

Mark only one oval.

Not at all capable

1 ☐

2 ☐

3 ☐

4 ☐

5 ☐

Totally capable

17. To what extent do you think you avoid situations where joints are smoked? \*

Mark only one oval.

Not at all capable

1 ☐

2 ☐

3 ☐

4 ☐

5 ☐

Totally capable

18. To what extent do you have fun without consuming marijuana or hash? \*

Mark only one oval.

Not at all capable

1 ☐

2 ☐

3 ☐

4 ☐

5 ☐

Totally capable

19. To what extent would you be capable to not smoke joints to relax? \*

Mark only one oval.

Not at all capable

1 ☐

2 ☐

3 ☐

4 ☐

5 ☐

Totally capable

20. Do you intend to consume marijuana or hash? \*

Mark only one oval.

Definitely No

1 ☐

2 ☐

3 ☐

4 ☐

5 ☐

Definitely Yes

21. Do you intend to consume marijuana or hash soon? \*

Mark only one oval.

Definitely No

1 ☐

2 ☐

3 ☐

4 ☐

5 ☐

Definitely Yes

22. If you had the chance, would you want to consume marijuana or hash? \*

*Mark only one oval.*

Definitely No

1 ☐

2 ☐

3 ☐

4 ☐

5 ☐

Definitely Yes

### Socio-demographic information

23. Gender \*

*Mark only one oval.*

☐ F

☐ M

☐ I prefer not to tell

## 24. Age \*

*Mark only one oval.*

☐ ≤ 22

☐ 23

☐ 24

☐ 25

☐ >25

## 25. Nationality

---

**ITEM: International Trauma Exposure Measure**

The International Trauma Exposure Measure (ITEM) is a new checklist developed to capture traumatic life events, and their associated features, in a manner consistent with the definition of a traumatic event in the 11th version of the International Classification of Diseases (ICD-11).

The ITEM measures exposure to different traumatic life events across different developmental periods (childhood, adolescence, and adulthood); frequency of exposure to one's most distressing traumatic event; and the main emotion associated with one's most distressing traumatic event. The ITEM is freely available to the research and clinical communities and there is no need of prior permission (<https://www.traumameasuresglobal.com/item>).

Please note that the ITEM uses educational descriptors to aid respondents to accurately identify the period of their life in which their trauma occurred. The educational descriptors used in this example are appropriate for the Irish context in which the scale was developed.

We are interested to know if you experienced any of the following traumatic life events during different periods of your life.

**Please read each description of a traumatic event**, and tell us if you experienced each event in childhood, adolescence, and/or adulthood.



26. 1. You were diagnosed with a life-threatening illness. \*

Did this event happen...

*Check all that apply.*

- ☐ Never
- ☐ Before or during your time in primary school? (up to age 12)
- ☐ During your time in secondary school? (between ages 13-18)
- ☐ After your time in secondary school? (after the age of 18)

27. 2. Someone close to you died in an awful manner. \*

Did this event happen...

*Check all that apply.*

- ☐ Never
- ☐ Before or during your time in primary school? (up to age 12)
- ☐ During your time in secondary school? (between ages 13-18)
- ☐ After your time in secondary school? (after the age of 18)

28. 3. Someone close to you was diagnosed with a life-threatening illness or experienced a life-threatening accident. \*

Did this event happen...

*Check all that apply.*

- ☐ Never
- ☐ Before or during your time in primary school? (up to age 12)
- ☐ During your time in secondary school? (between ages 13-18)
- ☐ After your time in secondary school? (after the age of 18)

29. 4. Someone threatened your life with a weapon (knife, gun, bomb etc.) \*

Did this event happen...

*Check all that apply.*

- ☐ Never
- ☐ Before or during your time in primary school? (up to age 12)
- ☐ During your time in secondary school? (between ages 13-18)
- ☐ After your time in secondary school? (after the age of 18)

30. 5. You were physically assaulted (punched, kicked, slapped, mugged, robbed etc.) \*

**by a parent or guardian.**

Did this event happen...

*Check all that apply.*

- ☐ Never
- ☐ Before or during your time in primary school? (up to age 12)
- ☐ During your time in secondary school? (between ages 13-18)
- ☐ After your time in secondary school? (after the age of 18)

31. 6. You were physically assaulted (punched, kicked, slapped, mugged, robbed etc.) \*

**by someone other than a parent or guardian.**

Did this event happen...

*Check all that apply.*

- ☐ Never
- ☐ Before or during your time in primary school? (up to age 12)
- ☐ During your time in secondary school? (between ages 13-18)
- ☐ After your time in secondary school? (after the age of 18)

32. 7. You were sexually assaulted (anal, vaginal, or oral penetration, or any contact with sexual parts) **by a parent or guardian**. \*

Did this event happen...

*Check all that apply.*

- ☐ Never
- ☐ Before or during your time in primary school? (up to age 12)
- ☐ During your time in secondary school? (between ages 13-18)
- ☐ After your time in secondary school? (after the age of 18)

33. 8. You were sexually assaulted (anal, vaginal, or oral penetration, or any contact with sexual parts) **by someone other** than a parent or guardian. \*

Did this event happen...

*Check all that apply.*

- ☐ Never
- ☐ Before or during your time in primary school? (up to age 12)
- ☐ During your time in secondary school? (between ages 13-18)
- ☐ After your time in secondary school? (after the age of 18)

34. 9. You were sexually harassed (unwanted sexualized comments or behaviours). \*
- Did this event happen...

*Check all that apply.*

- ☐ Never
- ☐ Before or during your time in primary school? (up to age 12)
- ☐ During your time in secondary school? (between ages 13-18)
- ☐ After your time in secondary school? (after the age of 18)

35. 10. You were exposed to war or combat (as a soldier or as a civilian). \*

Did this event happen...

*Check all that apply.*

- ☐ Never
- ☐ Before or during your time in primary school? (up to age 12)
- ☐ During your time in secondary school? (between ages 13-18)
- ☐ After your time in secondary school? (after the age of 18)

36. 11. You were held captive and/or tortured. \*

Did this event happen...

*Check all that apply.*

- ☐ Never
- ☐ Before or during your time in primary school? (up to age 12)
- ☐ During your time in secondary school? (between ages 13-18)
- ☐ After your time in secondary school? (after the age of 18)

37. 12. You caused extreme suffering or death to another person. \*

Did this event happen...

*Check all that apply.*

- ☐ Never
- ☐ Before or during your time in primary school? (up to age 12)
- ☐ During your time in secondary school? (between ages 13-18)
- ☐ After your time in secondary school? (after the age of 18)

38. 13. You witnessed another person experiencing extreme suffering or death. \*

Did this event happen...

*Check all that apply.*

- ☐ Never
- ☐ Before or during your time in primary school? (up to age 12)
- ☐ During your time in secondary school? (between ages 13-18)
- ☐ After your time in secondary school? (after the age of 18)

39. 14. You were involved in an accident (e.g., transportation, work, home, leisure) where your life was in danger. \*

Did this event happen...

*Check all that apply.*

- ☐ Never
- ☐ Before or during your time in primary school? (up to age 12)
- ☐ During your time in secondary school? (between ages 13-18)
- ☐ After your time in secondary school? (after the age of 18)

40. 15. You were exposed to a natural disaster (e.g., hurricane, tsunami, earthquake) where your life was in danger. \*

Did this event happen...

*Check all that apply.*

- ☐ Never
- ☐ Before or during your time in primary school? (up to age 12)
- ☐ During your time in secondary school? (between ages 13-18)
- ☐ After your time in secondary school? (after the age of 18)

41. 16. You were exposed to a human-made disaster (e.g., terrorist attack, chemical spill, public shooting) where your life was in danger. \*
- Did this event happen...

*Check all that apply.*

- ☐ Never
- ☐ Before or during your time in primary school? (up to age 12)
- ☐ During your time in secondary school? (between ages 13-18)
- ☐ After your time in secondary school? (after the age of 18)

42. 17. Another person stalked you. \*
- Did this event happen...

*Check all that apply.*

- ☐ Never
- ☐ Before or during your time in primary school? (up to age 12)
- ☐ During your time in secondary school? (between ages 13-18)
- ☐ After your time in secondary school? (after the age of 18)

43. 18. You were repeatedly bullied (online or offline). \*
- Did this event happen...

*Check all that apply.*

- ☐ Never
- ☐ Before or during your time in primary school? (up to age 12)
- ☐ During your time in secondary school? (between ages 13-18)
- ☐ After your time in secondary school? (after the age of 18)

44. 19. You were humiliated, put down, or insulted by another person. \*

Did this event happen...

*Check all that apply.*

- ☐ Never
- ☐ Before or during your time in primary school? (up to age 12)
- ☐ During your time in secondary school? (between ages 13-18)
- ☐ After your time in secondary school? (after the age of 18)

45. 20. You were made to feel unloved, unwelcome, or worthless. \*

Did this event happen...

*Check all that apply.*

- ☐ Never
- ☐ Before or during your time in primary school? (up to age 12)
- ☐ During your time in secondary school? (between ages 13-18)
- ☐ After your time in secondary school? (after the age of 18)

46. 21. You were neglected, ignored, rejected, or isolated. \*

Did this event happen...

*Check all that apply.*

- ☐ Never
- ☐ Before or during your time in primary school? (up to age 12)
- ☐ During your time in secondary school? (between ages 13-18)
- ☐ After your time in secondary school? (after the age of 18)

47. 22. Any other event not listed (please specify)...

---

---

---

---

---

48. Please tell us which event you found the most distressing by entering the number \* that corresponds to that event from the list above.

---

49. If you experienced this event more than once, please tell us approximately how \* many times you experienced this event?

---

50. How long ago did this event occur (most recent experience)? \*

*Mark only one oval.*

- ☐ I did not experience any traumatic life event
- ☐ Less than one month ago
- ☐ 1-6 months ago
- ☐ 6-12 months ago
- ☐ 1-5 years ago
- ☐ 6-10 years ago
- ☐ More than 10 years ago



51. What is the main emotion that you associate with this event? \*

*Mark only one oval.*

- ☐ Fear
- ☐ Anger
- ☐ Disgust
- ☐ Sadness
- ☐ Shame
- ☐ Guilt
- ☐ No emotion

### About you ...

52. You smoke ... \*

*Mark only one oval.*

- ☐ Daily
- ☐ 1-3 cigarettes/week
- ☐ At parties, with friends
- ☐ Never

53. You drink alcoholic beverages ... \*

*Mark only one oval.*

- ☐ Daily
- ☐ 1-3 drinks/week
- ☐ At parties, with friends
- ☐ Never

54. You began smoking ... \*

*Mark only one oval.*

- ☐ In college
- ☐ In high school
- ☐ I do not smoke

55. Marital status ... \*

*Mark only one oval.*

- ☐ Married
- ☐ Not married, but in a stable relationship
- ☐ Single

56. Do you think cannabis use should be legalized for the general population? \*  
(similar to alcohol or tobacco)

*Mark only one oval.*

- ☐ Yes
- ☐ No

## ITQ: International Trauma Questionnaire

International Trauma Questionnaire (ITQ) focuses on the core features of PTSD (post-traumatic stress disorder) and CPTSD (complex

post-traumatic stress disorder), and employs straightforward diagnostic rules.

The ITQ was developed to be consistent with the organizing principles of the ICD-11, as set forth by the *World Health Organization*, which are to maximize clinical utility and ensure international applicability through a focus on the core symptoms of a given disorder.

The ITQ is freely available in the public domain to all interested parties (<https://www.traumameasuresglobal.com/itq>).

Please **identify the experience** that troubles you most and answer the questions in relation to that experience.

57. How true is this of you? \*  
When I am upset, it takes me a long time to calm down.

Mark only one oval.

Not at all

\_\_\_\_\_

1

☐

\_\_\_\_\_

2

☐

\_\_\_\_\_

3

☐

\_\_\_\_\_

4

☐

\_\_\_\_\_

5

☐

\_\_\_\_\_

Extremely

\_\_\_\_\_

58. How true is this *of you?* \*  
I feel numb or emotionally shut down.

Mark only one oval.

Not at all

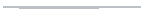

1

☐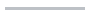

2

☐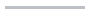

3

☐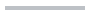

4

☐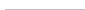

5

☐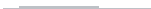

Extremely

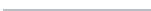

59. How true is this *of you?* \*  
I feel like a failure.

Mark only one oval.

Not at all

1

2

3

4

5

Extremely

60. How true is this *of you?* \*  
I feel worthless.

Mark only one oval.

Not at all

1

2

3

4

5

Extremely

61. How true is this *of you?* \*
- I feel distant or cut off from people.

Mark only one oval.

Not at all

---

1

☐

---

2

☐

---

3

☐

---

4

☐

---

5

☐

---

Extremely

---

62. How true is this *of you?* \*  
I find it hard to stay emotionally close to people.

Mark only one oval.

Not at all

1

2

3

4

5

Extremely



63. In *the past month*, have the above problems in emotions, in beliefs about yourself \*  
and in relationships ...  
... created concern or distress about your relationships or social life?

Mark only one oval.

Not at all

---

1

☐

---

2

☐

---

3

☐

---

4

☐

---

5

☐

---

Extremely

---

64. In *the past month*, have the above problems in emotions, in beliefs about yourself \*  
and in relationships ...  
... affected your work or ability to work?

Mark only one oval.

Not at all

---

1

☐

---

2

☐

---

3

☐

---

4

☐

---

5

☐

---

Extremely

---

65. In *the past month*, have the above problems in emotions, in beliefs about yourself \*  
and in relationships ...  
... affected any other important parts of your life such as parenting, or school or  
college work, or other important activities?

*Mark only one oval.*

Not at all

1

☐

2

☐

3

☐

4

☐

5

☐

Extremely

**At the end ...**

We **kindly thank you** for your participation.

If you want to contact one of the specialists from the Liaison Psychiatry Department of the  
"Pius Brinzeu" County Emergency Clinical Hospital in Timisoara for direct communication,  
you can do so directly:

Dr. Anca-Livia Panfil: <*e-mail*>

Dr. Simona Tămășan: <*e-mail*>

In addition, you can benefit from the application of a psychiatric dissociation diagnostic tool  
(which cannot be self-administered) and a one- or two-year follow-up -- leave us your email  
address for contact.

66. Contact information ...

---

---

---

---

---

This content is neither created nor endorsed by Google.

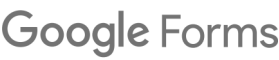

Supplement: s1 [file s1]
