# Supplementary material for: Medical Students’ Views on Cannabis Use in Recreational Contexts Are Related to Their Own Consumption Intention
Source: MDPI journal article supplement (doi:10.3390/soc14040052), 2024-04-11
Supplement: s1 [file s1]

**Table S1a** Internal consistency of CUIQ, and CUIQ subscales for the RO group of participants  
(N=142 number of data observations)

| CUIQ subscale               | No of items | Cronbach's alpha |
|-----------------------------|-------------|------------------|
| Total CUIQ                  | 15          | 0.843            |
| Attitude                    | 4           | 0.884            |
| Subjective norm             | 3           | 0.759            |
| Self-efficacy to abstinence | 5           | 0.909            |
| Intention                   | 3           | 0.928            |

**Table S1b** Confirmatory factor analysis (CFA) analysis for CUIQ scale for the RO group of participants, based on the four factors originally identified: attitudes, subjective norm (SN), self-efficacy to abstinence (SEA), intention. (N=142 number of data observations)

| Second order four-factor CFA model for CUIQ scale                                                                                                                                                                                                                                                                                                                      |          |       |                 |                                |           |
|------------------------------------------------------------------------------------------------------------------------------------------------------------------------------------------------------------------------------------------------------------------------------------------------------------------------------------------------------------------------|----------|-------|-----------------|--------------------------------|-----------|
| <i>Attitude</i> = $\sim$ CUIQatt1 + CUIQatt2 + CUIQatt3 + CUIQatt4<br><i>SN</i> = $\sim$ CUIQsn1 + CUIQsn2 + CUIQsn3<br><i>SEA</i> = $\sim$ CUIQsea1 + CUIQsea2 + CUIQsea3 + CUIQsea4 + CUIQsea5<br><i>Intention</i> = $\sim$ CUIQint1 + CUIQint2 + CUIQint3<br><i>Attitude</i> $\sim$ SN + SEA<br><i>SN</i> $\sim$ SEA<br><i>Intention</i> $\sim$ Attitude + SN + SEA |          |       |                 |                                |           |
| Fit indices (142 observations)                                                                                                                                                                                                                                                                                                                                         |          |       |                 |                                |           |
| Chi-square test                                                                                                                                                                                                                                                                                                                                                        |          | CFI   |                 | RMSEA                          | SRMR      |
| 197.735 (df=84)<br>p<0.001                                                                                                                                                                                                                                                                                                                                             |          | 0.930 |                 | 0.098<br>90% CI (0.080; 0.115) | 0.078     |
| Regressions <sup>(a)</sup>                                                                                                                                                                                                                                                                                                                                             |          |       |                 |                                |           |
| <i>Intention</i> ~                                                                                                                                                                                                                                                                                                                                                     |          |       |                 |                                |           |
|                                                                                                                                                                                                                                                                                                                                                                        | Attitude |       | 0.423 ± 0.082   |                                | < 0.001** |
|                                                                                                                                                                                                                                                                                                                                                                        | SN       |       | 0.825 ± 0.176   |                                | < 0.001** |
|                                                                                                                                                                                                                                                                                                                                                                        | SEA      |       | -0.378 ± 0.140  |                                | 0.007**   |
| Covariances <sup>(a)</sup>                                                                                                                                                                                                                                                                                                                                             |          |       |                 |                                |           |
| Attitude $\sim$ SN                                                                                                                                                                                                                                                                                                                                                     |          |       | 0.638 ± 0.123   |                                | < 0.001** |
| Attitude $\sim$ SEA                                                                                                                                                                                                                                                                                                                                                    |          |       | -0.041 ± 0.0765 |                                | 0.586     |
| SN $\sim$ SEA                                                                                                                                                                                                                                                                                                                                                          |          |       | -0.038 ± 0.045  |                                | 0.393     |

<sup>(a)</sup> regression coefficients and covariance values are expressed as estimate ± standard error, and p-values for statistical significance

**Table S2a** Internal consistency of DSO, and DSO subscales for the RO group of participants  
(N=142 number of data observations)

| ITQ-DSO subscale                   | No of items | Cronbach's alpha |
|------------------------------------|-------------|------------------|
| Total DSO                          | 9           | 0.922            |
| Affect dysregulation (AD)          | 2           | 0.594            |
| Negative self-concept (NSC)        | 2           | 0.874            |
| Disturbances in relationships (DR) | 2           | 0.738            |
| DSO-related functional impairment  | 3           | 0.933            |

**Table S2b** Confirmatory factor analysis (CFA) analysis for DSO scale for the RO group of participants, based on the four factors originally identified: affect dysregulation (AD), negative self-concept (NSC), disturbances in relationships (DR), functional impairment (FI). (N=142 number of data observations)

| First order four-factor CFA model for DSO scale                                                                                                                                                                                                                          |  |               |  |                                |       |
|--------------------------------------------------------------------------------------------------------------------------------------------------------------------------------------------------------------------------------------------------------------------------|--|---------------|--|--------------------------------|-------|
| <i>AD = ~ DSO1_sad + DSO2_numb</i><br><i>NSC = ~ DSO3_failure + DSO4_worthless</i><br><i>DR = ~ DSO5_distant + DSO6_closeness</i><br><i>FI = ~ DSO7_concernrel + DSO8_work + DSO9_otherparts</i><br><i>FI ~ AD + NSC + DR</i><br><i>AD ~ NSC + DR</i><br><i>NSC ~ DR</i> |  |               |  |                                |       |
| Fit indices (171 observations)                                                                                                                                                                                                                                           |  |               |  |                                |       |
| Chi-square test                                                                                                                                                                                                                                                          |  | CFI           |  | RMSEA                          |       |
| 44.168 (df=21)<br>p=0.002                                                                                                                                                                                                                                                |  | 0.975         |  | 0.088<br>90% CI (0.051; 0.125) | 0.038 |
| Covariances <sup>(a)</sup>                                                                                                                                                                                                                                               |  |               |  |                                |       |
| <i>AD ~ NSC</i>                                                                                                                                                                                                                                                          |  | 0.672 ± 0.130 |  | < 0.001**                      |       |
| <i>AD ~ DR</i>                                                                                                                                                                                                                                                           |  | 0.610 ± 0.122 |  | < 0.001**                      |       |
| <i>AD ~ FI</i>                                                                                                                                                                                                                                                           |  | 0.619 ± 0.122 |  | < 0.001**                      |       |
| <i>NSC ~ DR</i>                                                                                                                                                                                                                                                          |  | 1.125 ± 0.176 |  | < 0.001**                      |       |
| <i>NSC ~ FI</i>                                                                                                                                                                                                                                                          |  | 1.094 ± 0.174 |  | < 0.001**                      |       |
| <i>DR ~ FI</i>                                                                                                                                                                                                                                                           |  | 0.929 ± 0.160 |  | < 0.001**                      |       |

<sup>(a)</sup> covariance values are expressed as estimate ± standard error, and p-values for statistical significance

**Table S3** Logistic regression analysis of opinion on legalization of recreational cannabis (N=171 number of data observations). CUIQ–Intention is a rank variable with values between 1 and 5. Exp (B) is equivalent to the odds ratio (OR), a measure of a relationship's strength between the predictor and the binary outcome

**Model 0:** Cannabis use should be legalized ~ Intention to use

| Predictor      | B ± Std. err | p-value   | Exp (B) (95% CI)      |
|----------------|--------------|-----------|-----------------------|
| CUIQ–Intention | 1.01 ± 0.191 | < 0.001** | 2.744 (1.886 – 3.993) |

Nagelkerke R-square = 0.304

**Model 1:** Cannabis use should be legalized ~ Intention to use + Gender (0,1,2) + Age + Smoking + Drinking alcohol + Smoking onset + DSO-AD + DSO-NSC + DSO-DR + DSO-FI + group (EN,RO)

| Predictor                | B ± Std. err   | p-value   | Exp (B) (95% CI)      |
|--------------------------|----------------|-----------|-----------------------|
| CUIQ–Intention           | 1.071 ± 0.221  | < 0.001** | 2.918 (1.893 – 4.497) |
| Gender 0 (Not specified) |                |           | 1                     |
| Gender 1/0               | -0.837 ± 1.042 | 0.422     | 0.433 (0.056 – 3.335) |
| Gender 2/0               | 0.340 ± 0.428  | 0.428     | 1.405 (0.607 – 3.253) |
| Age                      | -0.223 ± 0.161 | 0.166     | 0.800 (0.583 – 1.097) |
| Smoking                  | 0.322 ± 0.209  | 0.123     | 1.380 (0.917 – 2.077) |
| Drinking alcohol         | 0.272 ± 0.396  | 0.493     | 1.313 (0.604 – 2.855) |
| Smoking onset            | -0.165 ± 0.332 | 0.620     | 0.848 (0.443 – 1.625) |
| DSO-AD                   | -0.071 ± 0.128 | 0.578     | 0.931 (0.725 – 1.196) |
| DSO-NSC                  | -0.073 ± 0.125 | 0.560     | 0.930 (0.728 – 1.188) |
| DSO-DR                   | 0.057 ± 0.110  | 0.609     | 1.058 (0.852 – 1.314) |
| DSO-FI                   | 0.004 ± 0.081  | 0.965     | 1.004 (0.857 – 1.175) |
| group EN                 |                |           | 1                     |
| group RO/EN              | 0.676 ± 0.535  | 0.206     | 1.965 (0.689 – 5.605) |

Nagelkerke R-square = 0.368

**Abbreviations:** AD, affect dysregulation; B ± Std. err, coefficient of regression ± standard error; CI, confidence interval; CUIQ, cannabis use intention questionnaire; DR, disturbances in relationships; DSO, disturbances in self-regulation; FI, functional impairment; NSC, negative self-concept

Statistical significance: \*\* p < 0.01
